# Supplementary material for: Targeting lncRNA DDIT4‐AS1 Sensitizes Triple Negative Breast Cancer to Chemotherapy via Suppressing of Autophagy
Source: PubMed Central journal article supplement (PMC10265098; doi:10.1002/advs.202207257), 2023-04-25
Supplement: ADVS-10-2207257-s001.pdf [file ADVS-10-2207257-s001.pdf]

## Supporting Information

for *Adv. Sci.*, DOI 10.1002/adv.202207257

Targeting lncRNA DDIT4-AS1 Sensitizes Triple Negative Breast Cancer to Chemotherapy via Suppressing of Autophagy

*Ting Jiang, Jiaojiao Zhu, Shilong Jiang, Zonglin Chen, Ping Xu, Rong Gong, Changxin Zhong, Yueying Cheng, Xinyuan Sun, Wenjun Yi, Jinming Yang, Wenhui Zhou and Yan Cheng\**

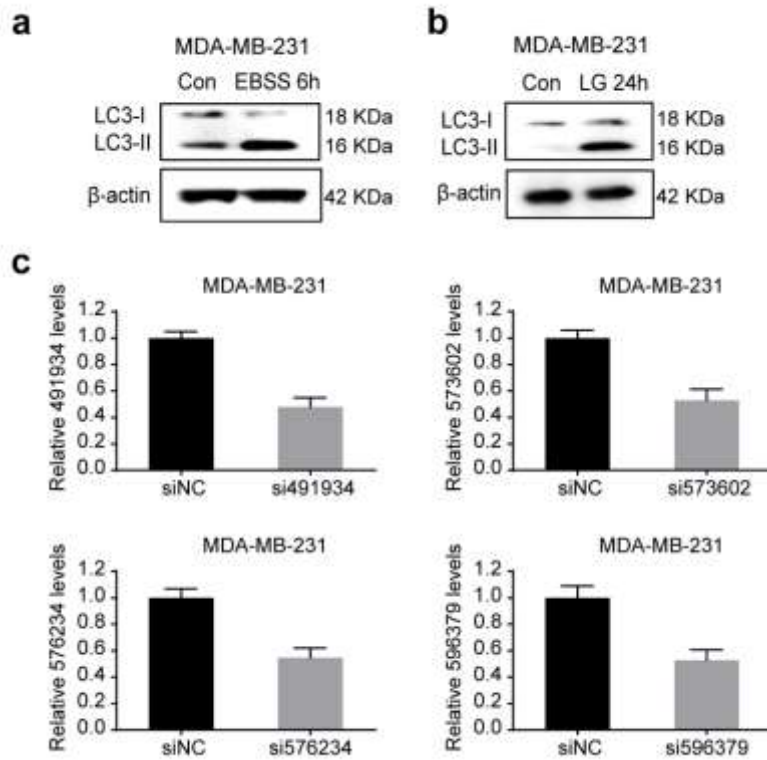

**Supplementary Fig. 1 Screening of autophagy related lncRNAs.** **a** Western blot showing the LC3-II/LC3-I ratio of MDA-MB-231 cells was induced by EBSS, and RNA-seq was taken from the same batch of cell samples. **b** Western blot confirming the LC3-II/LC3-I ratio of MDA-MB-231 cells was increased by low glucose medium treatment. **c** qRT-PCR analysis was used to detect the silencing efficacy of siRNAs of four lncRNAs in MDA-MB-231 cells.  $\beta$ -actin was the internal control.

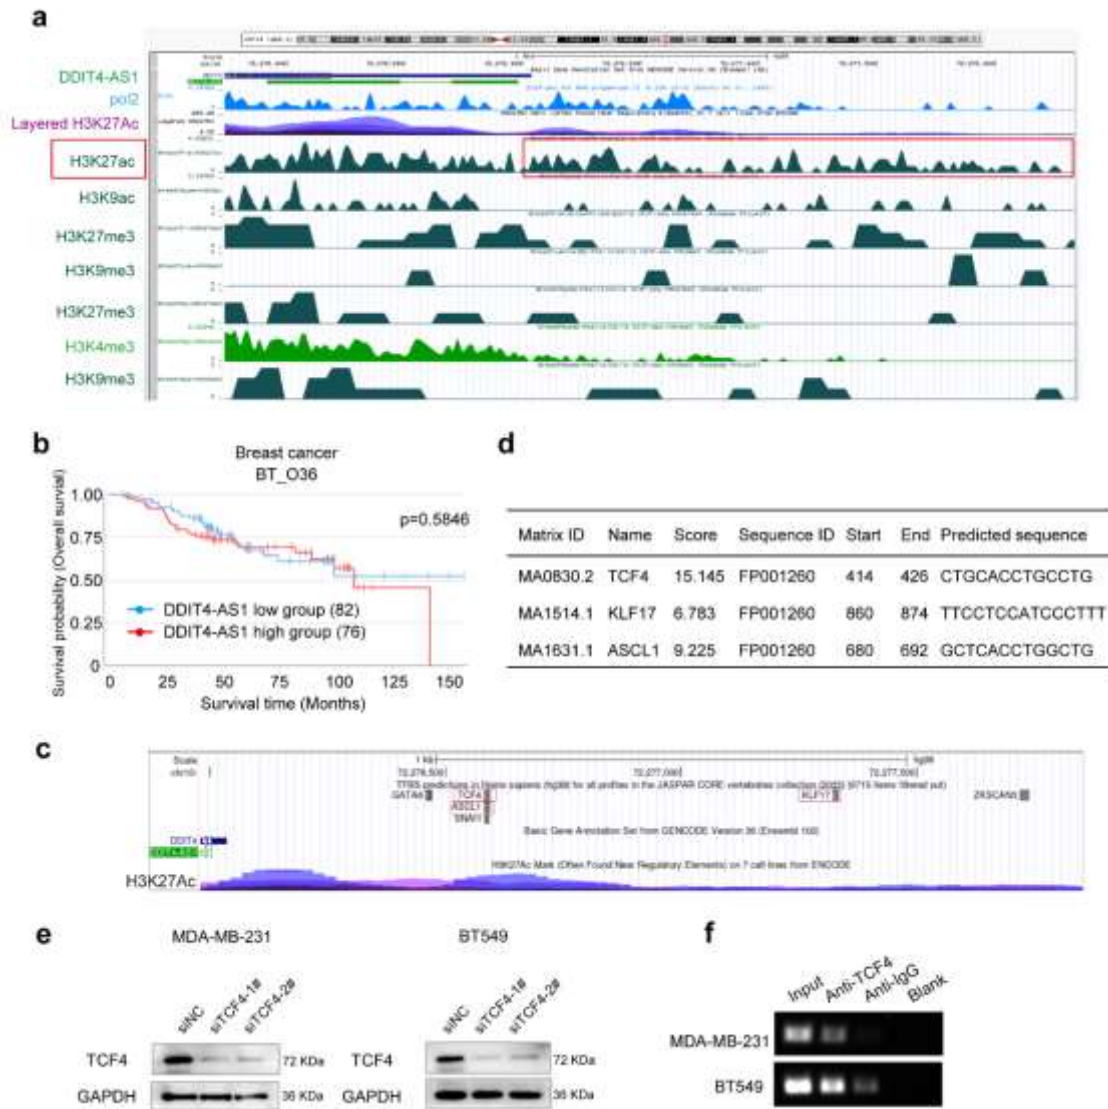

**Supplementary Fig. 2 The lncRNA DDIT4-AS1 is activated by H3K27ac and TCF4.** **a** The gene annotation information in UCSC database indicated histone modifications of DDIT4-AS1 promoter. **b** The association between DDIT4-AS1 expression and overall survival of breast cancer patients was obtained from the LnCAR database. **c** Online prediction from JASPAR TFBS in the UCSC Genome Browser suggested that TCF4, ASCL1 and KLF17 are potential transcription factors of DDIT4-AS1. **d** The JASPAR database was used to predict the binding site sequences of the candidate transcription factors in the promoter regions of DDIT4-AS1. **e** MDA-MB-231 and BT549 cells were transfected with the indicated siRNAs, and the expression of TCF4 was examined by western blot. **f** CHIP and RT-PCR assays using anti-TCF4 antibody showed that TCF4 was enriched at the

promoter region of DDIT4-AS1.

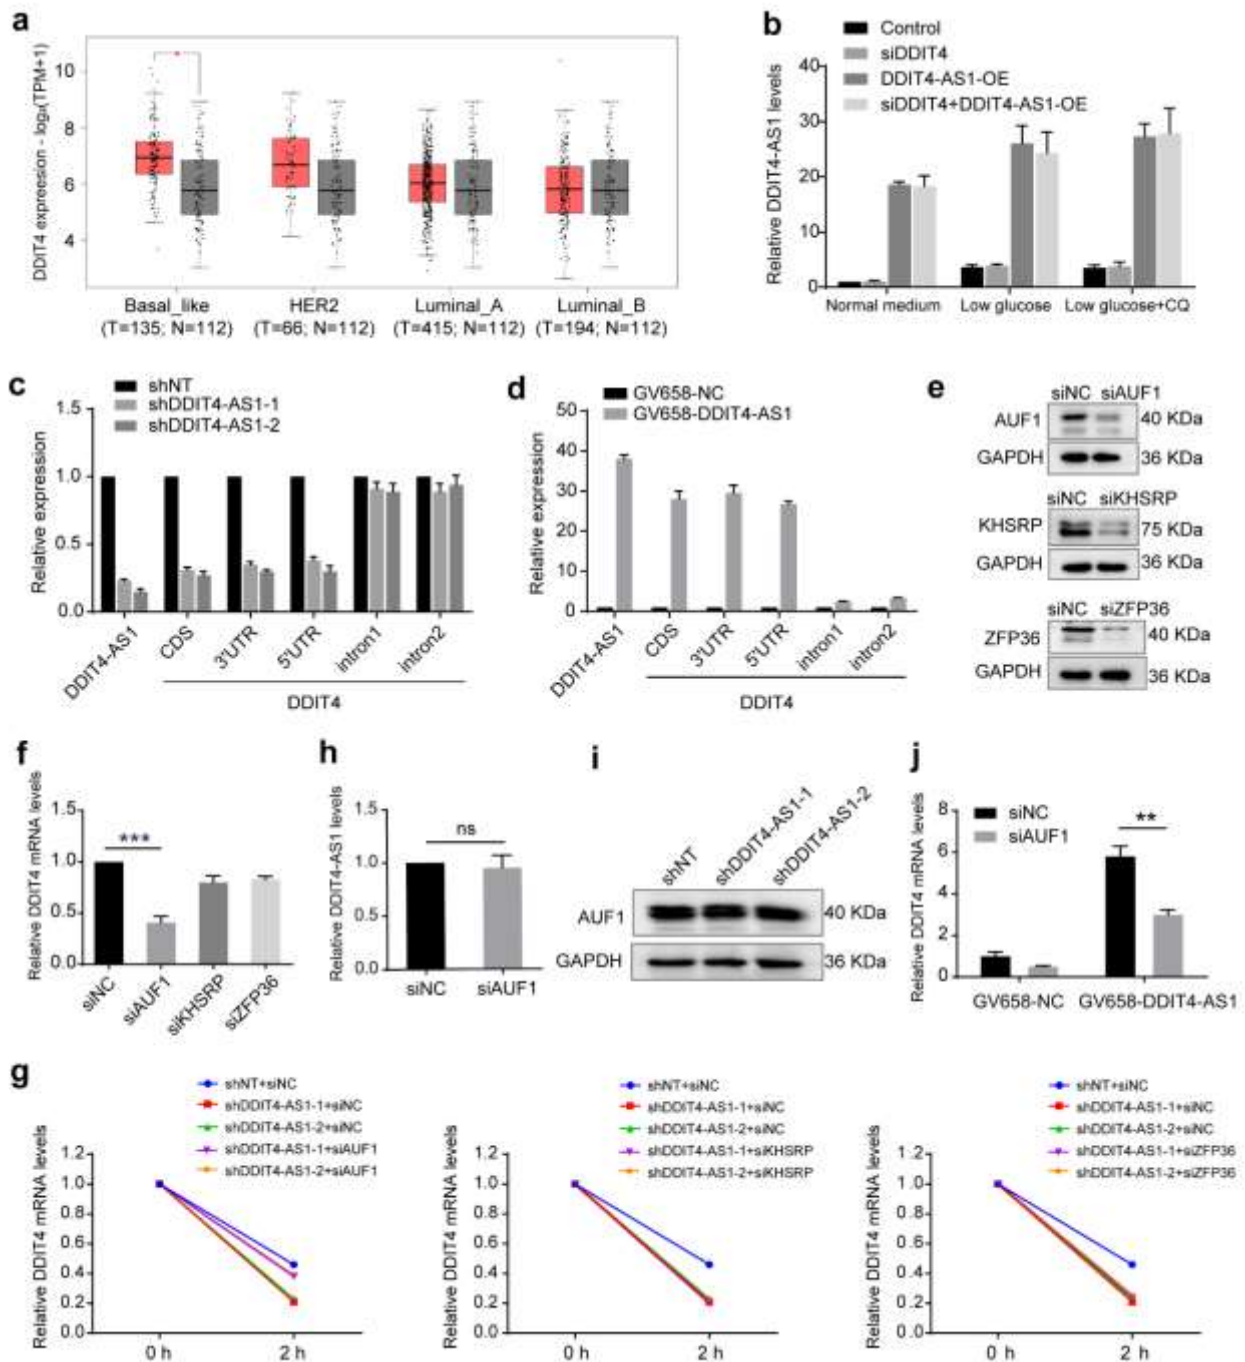

**Supplementary Fig. 3 DDIT4-AS1 posttranscriptional regulates DDIT4 via AUF1.** **a.** The expression of DDIT4 among different types of breast tumor and non-tumor tissues were obtained from the GEPIA2.0 database. **b.** qRT-PCR analysis of DDIT4-AS1 levels in MDA-MB-231 cells treated with CQ, different medium condition, or subjected to DDIT4-AS1 overexpression or DDIT4 knockdown.  $\beta$ -actin

was used as the internal control. **c-d** qRT-PCR analysis of DDIT4 pre-mRNA (intron1, intron2) and mature mRNA (3'-UTR, CDS and 5'-UTR) expression in MDA-MB-231 cells with DDIT4-AS1 knockdown (c) or overexpression (d).  $\beta$ -actin was the internal control. **e** Western blot showing the knockdown effects of siRNAs. **f** MDA-MB-231 cells were transfected with indicated siRNAs, qRT-PCR was used to detect the expression of DDIT4.  $\beta$ -actin was the internal control.  $***p < 0.001$ . **g** 2.5  $\mu$ g/ml ActD were used to block mRNA transcription. qRT-PCR was used to detect the effect of DDIT4-AS1 knockdown and siNC/siKHSRP/siZFP36/siAUF1 on the degradation rate of DDIT4 mRNA in MDA-MB-231. 18s was the internal control. **h** qRT-PCR analysis of DDIT4-AS1 expression in MDA-MB-231 cells with AUF1 silencing.  $\beta$ -actin was the internal control. **i** Western blotting was used to detect the effect of DDIT4-AS1 knockdown on the expression of AUF1 protein in MDA-MB-231. **j** QRT-PCR analysis of DDIT4 mRNA levels in MDA-MB-231 cells transfected with siRNAs or vectors as indicated.  $\beta$ -actin was the internal control.  $**p < 0.01$ .

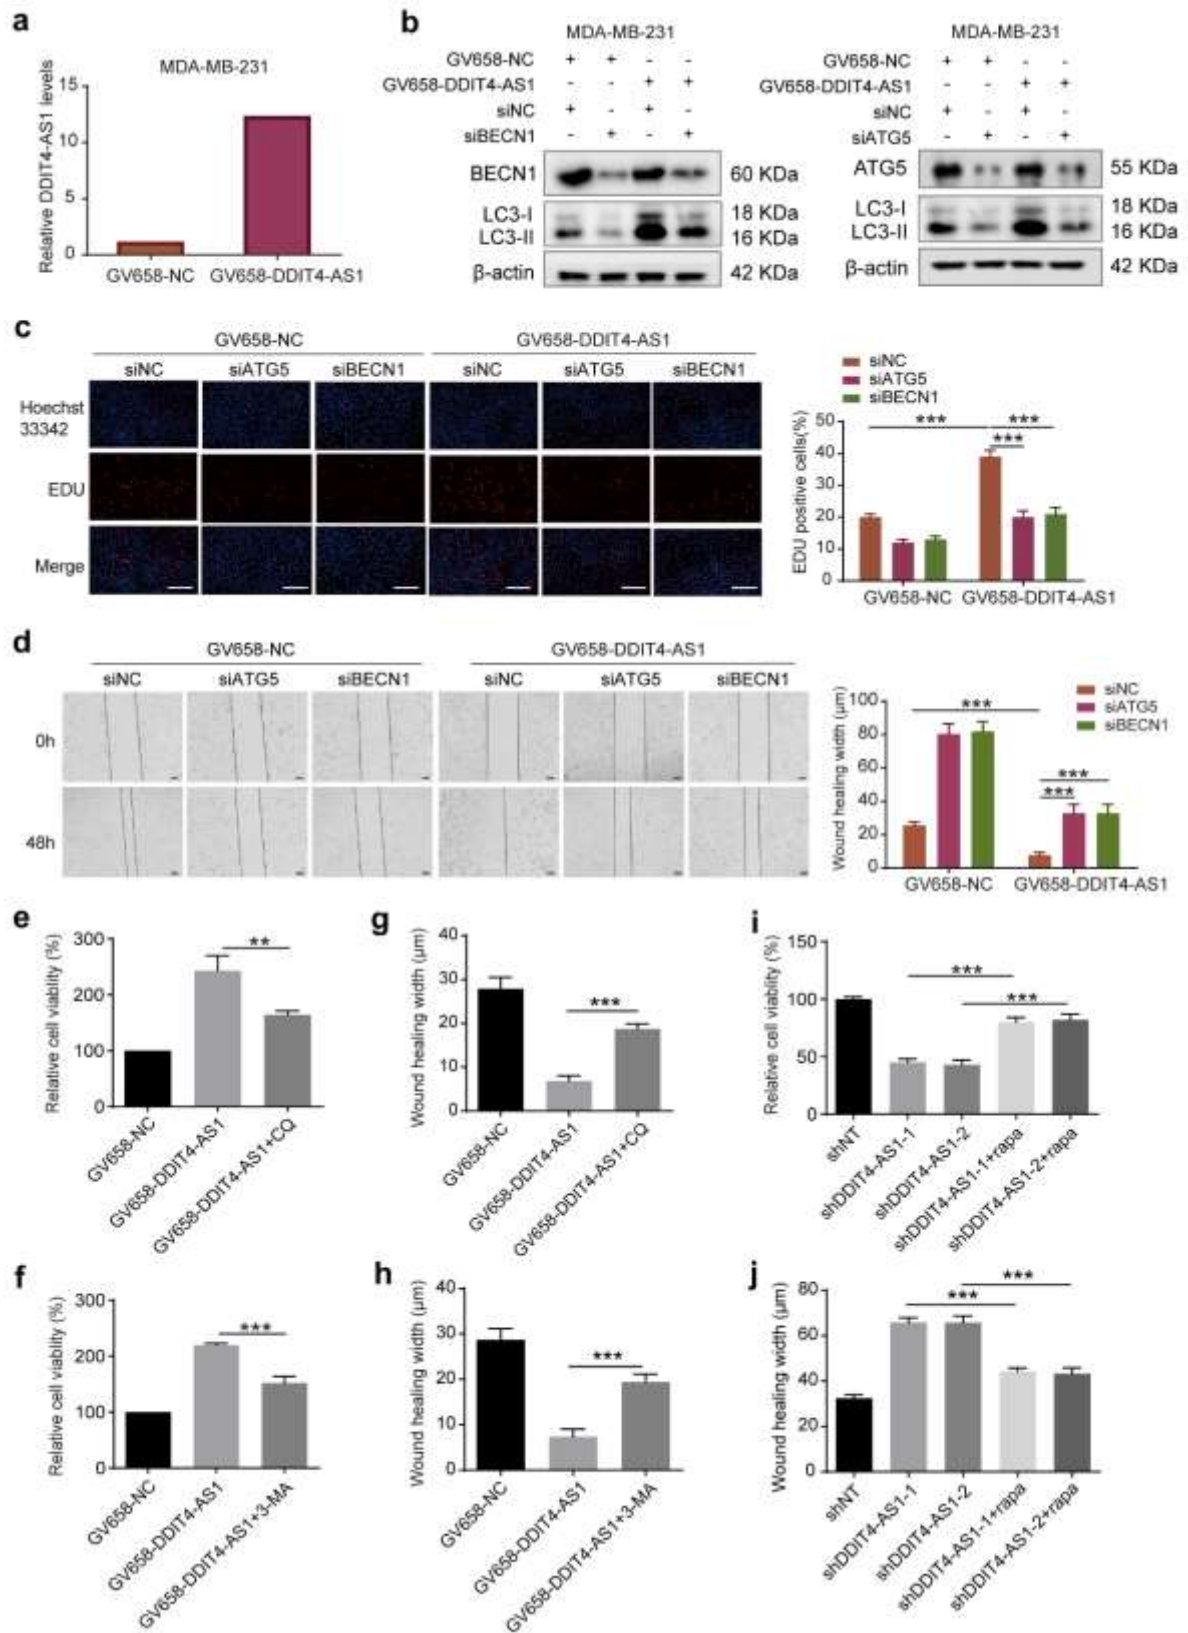

**Supplementary Fig. 4 DDIT4-AS1 induces higher autophagy activity of MDA-MB-231 cells.** **a** qRT-PCR was performed to measure the expression level of DDIT4-AS1 in MDA-MB-231 transfected with GV658-NC or GV658-DDIT4-AS1.

$\beta$ -actin was the internal control. **b** Western blot was used to detect indicated proteins in MDA-MB-231 with various treatments. **c** EDU assay detecting EDU positive cells of MDA-MB-231 subjected to various treatments. Scale bar, 200  $\mu\text{m}$ .  $***p < 0.001$ . **d** Scratch assay showing the effect of various treatments on cell migration of MDA-MB-231. Scale bar, 100  $\mu\text{m}$ .  $***p < 0.001$ . **e-f** 48 hours after cell seeding, CCK8 assay was used to examine cell viability of MDA-MB-231 cell subjected to various treatments.  $**p < 0.01$ .  $***p < 0.001$ . **g-h** 48 hours after cell scratching, wounding healing width was measured to show the effect of various treatments on cell migration of MDA-MB-231.  $***p < 0.001$ . **i** 48 hours after cell seeding, CCK8 assay was used to examine cell viability of MDA-MB-231 cell subjected to various treatments.  $***p < 0.001$ . **j** 48 hours after cell scratching, wounding healing width was measured to show the effect of various treatments on cell migration of MDA-MB-231.



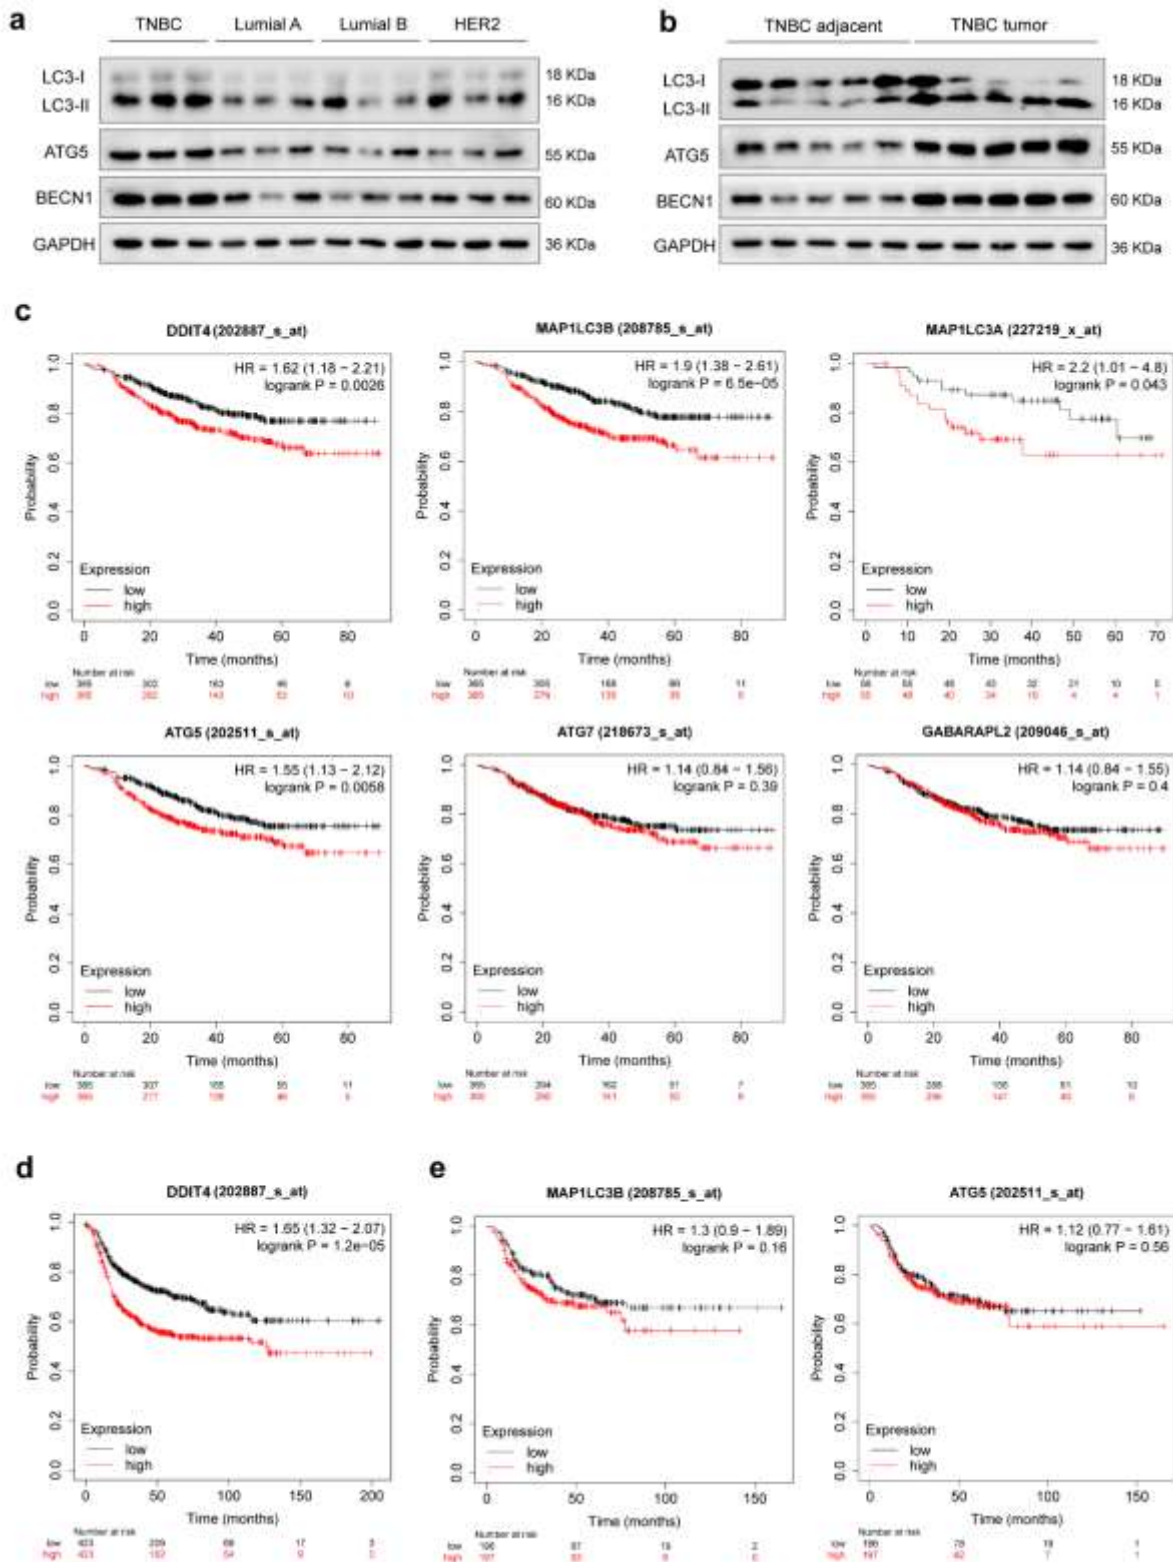

**Supplementary Fig. 5 Elevated levels of DDIT4 and autophagy-related genes correlate with poor relapse-free survival in breast cancer patients. a** Western blot was used to detect indicated proteins in three tumor tissues of different type of breast cancers. **b** Western blot was used to detect indicated proteins in five pairs of TNBC



tumor and adjacent tissues. **c** Kaplan–Meier analysis showed the association between expression of DDIT4 or autophagy-related genes (MAP1LC3B, MAP1LC3A, ATG5, ATG7, GABARAPL2) and relapse-free survival of breast cancer patients received neoadjuvant chemotherapy. **d** Kaplan–Meier analysis showed the association between DDIT4 expression and relapse-free survival of basal-like breast cancer patients received systemic treatment. **e** Kaplan–Meier analysis showed the association between expression of MAP1LC3B or ATG5 and relapse-free survival of basal-like breast cancer patients received chemotherapy.

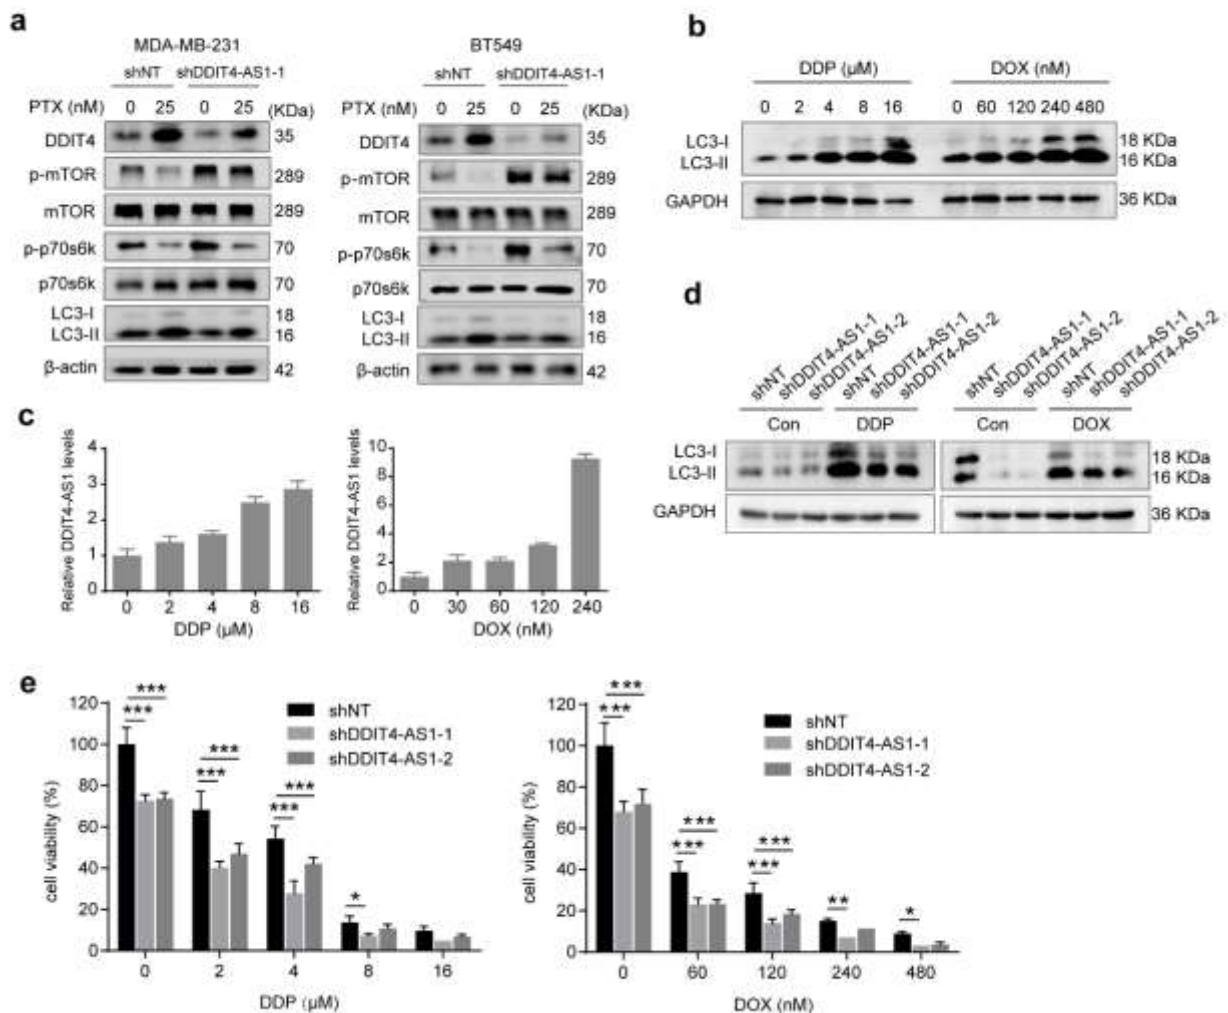

**Supplementary Fig. 6 DDIT4-AS1 attenuates chemosensitivity of breast cancer cells to chemotherapeutic agents. a** Western blot showing the effects of DDIT4-AS1 knockdown on indicated proteins in MDA-MB-231 and BT549 cells treated with PTX

for 48 h. **b** MDA-MB-231 were treated with cisplatin (DDP) or doxorubicin (DOX) as indicated, and then the level of LC3 and GAPDH proteins was examined by western blot. **c** MDA-MB-231 were treated with DDP or DOX as indicated, and then the level of DDIT4-AS1 was examined by qRT-PCR.  $\beta$ -actin was the internal control. **d** Western blot showing the effects of DDIT4-AS1 knockdown on LC3 expression in MDA-MB-231 cells treated with DDP or DOX. **e** Cell viability was analyzed by CCK-8 assay after DDP or DOX treatment for 48 h in DDIT4-AS1 knockdown cells.  $*p < 0.05$ ,  $**p < 0.01$ ,  $***p < 0.001$ .

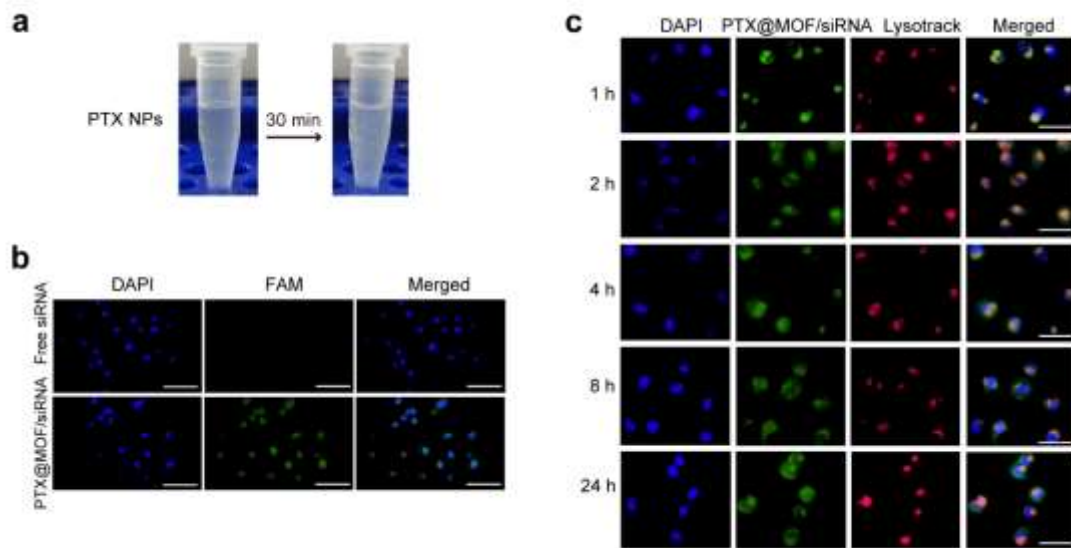

**Supplementary Fig. 7 Biological behavior of PTX@MOF/siDDIT4-AS1 NPs. a** The insolubility of paclitaxel in aqueous solution. **b** Fluorescent images of BT549 cells after incubating with free siDDIT4-AS1 and PTX@MOF/siDDIT4-AS1 for 4 h. Scale bar, 100  $\mu$ m. **c** Costaining of endo/lysosomes to evaluate the endo/lysosomes escape in BT549 cells. Scale bar, 50  $\mu$ m.

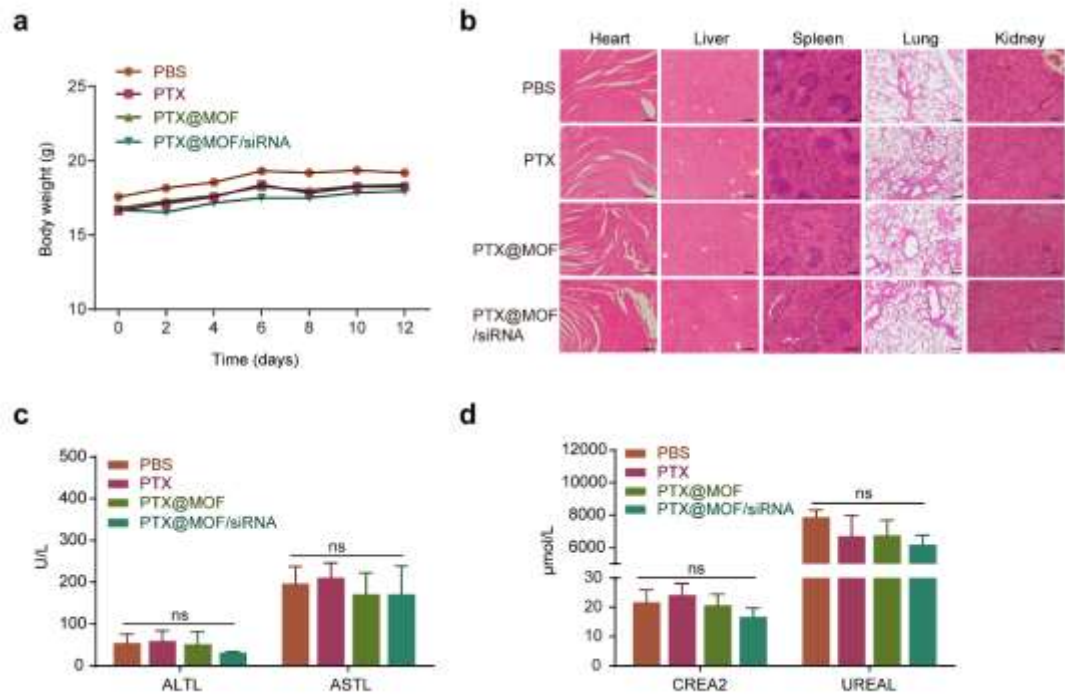

**Supplementary Fig. 8 Toxicity analysis of PTX@MOF/siDDIT4-AS1 NPs. a** Average body weights of mice during different treatments. **b** Histology images of H&E staining slices for the major organs (heart, liver, spleen, lung, and kidney) obtained from mice with indicated treatments. Scale bar, 500  $\mu\text{m}$ . **c** Evaluation of the hepatotoxicity of various treatments by measuring the serum levels of ALT and AST. **d** Evaluation of the nephrotoxicity of various treatments by measuring the serum levels of CREA2 and UREAL.

**Table S1. The selected candidate lncRNAs for subsequent verification.**

| <b>Id</b>         | <b>Gene</b> | <b>Con</b>  | <b>EBSS</b> | <b>Fold Change</b> | <b>log<sub>2</sub> FoldChange</b> | <b>p-val</b> |
|-------------------|-------------|-------------|-------------|--------------------|-----------------------------------|--------------|
| NR_102422         | AOC3        | 22.18768287 | 198.2482171 | 8.935057268        | 3.159476976                       | 1.26235E-06  |
| NR_015421         | LOC154761   | 26.07981026 | 158.3853481 | 6.07310201         | 2.602433602                       | 1.96252E-05  |
| ENST00000596379.1 | LINC02560   | 3.83926084  | 157.7723659 | 41.09446389        | 5.360872147                       | 0.000235237  |
| ENST00000576234.1 | AC127496.1  | 73.9199819  | 521.4713437 | 7.054538304        | 2.818551666                       | 2.06176E-12  |
| ENST00000573602.1 | AC127496.1  | 18.726028   | 454.5916825 | 24.27592666        | 4.601454462                       | 7.36842E-12  |
| ENST00000562471.1 | AL512274.1  | 16.67563243 | 137.8244487 | 8.265020793        | 3.047018449                       | 0.001922023  |
| ENST00000491934.2 | DDIT4-AS1   | 360.5066471 | 8287.827467 | 22.98938878        | 4.522896204                       | 1.83772E-21  |

**Table S2. Relationship between DDIT4-AS1 expression and clinical features in breast cancer**

| <b>Characteristic</b>             | <b>Total</b> | <b>DDIT4-AS1 expression</b> |                     | $\chi^2$ | <i>p</i>        |
|-----------------------------------|--------------|-----------------------------|---------------------|----------|-----------------|
|                                   |              | <b>Low (n =40)</b>          | <b>High (n =40)</b> |          |                 |
| <b>Gender</b>                     |              |                             |                     | 0.3463   | 0.5562          |
| Female                            | 77           | 39                          | 38                  |          |                 |
| Male                              | 3            | 1                           | 2                   |          |                 |
| <b>Age(years)</b>                 |              |                             |                     | 0.8333   | 0.3613          |
| ≥50                               | 32           | 18                          | 14                  |          |                 |
| < 50                              | 48           | 22                          | 26                  |          |                 |
| <b>Tumor size</b>                 |              |                             |                     | 3.6522   | 0.1611          |
| ≥10                               | 26           | 9                           | 17                  |          |                 |
| 5<<10                             | 42           | 24                          | 18                  |          |                 |
| ≤5                                | 12           | 7                           | 5                   |          |                 |
| <b>Histologic differentiation</b> |              |                             |                     | 1.8291   | 0.1763          |
| Well                              | 70           | 37                          | 33                  |          |                 |
| Poor                              | 10           | 3                           | 7                   |          |                 |
| <b>Lymph node metastasis</b>      |              |                             |                     | 3.1641   | 0.0753          |
| Yes                               | 21           | 6                           | 15                  |          |                 |
| No                                | 59           | 34                          | 25                  |          |                 |
| <b>TNM stage</b>                  |              |                             |                     | 6.3731   | <b>0.0116 *</b> |
| I                                 | 31           | 21                          | 10                  |          |                 |
| II/III                            | 49           | 19                          | 30                  |          |                 |
| <b>Tumor number</b>               |              |                             |                     | 0.1054   | 0.7454          |
| ≥2                                | 11           | 5                           | 6                   |          |                 |
| ≤1                                | 69           | 35                          | 34                  |          |                 |
| <b>Ki67(%)</b>                    |              |                             |                     | 5.9521   | <b>0.0147*</b>  |
| ≥30                               | 24           | 7                           | 17                  |          |                 |

&lt; 30

56

33

23

Statistical analyses were carried out using Pearson  $\chi^2$  test. \* $p < 0.05$  was considered significant.

**Table S3. The expression information of DDIT4-AS1 and DDIT4 mRNA from the RNA sequencing data.**

| id                | Gene                  | 231-Co<br>n | 231-EBS<br>S | Fold<br>Change | log <sub>2</sub> Fold<br>Change | p val    | p adj    |
|-------------------|-----------------------|-------------|--------------|----------------|---------------------------------|----------|----------|
| ENST00000491934.2 | ENSG0000026<br>9926.1 | 360.51      | 8287.83      | 22.99          | 4.52                            | 1.84E-21 | 2.55E-18 |
| NM_019058         | DDIT4                 | 729.52      | 16851.15     | 23.10          | 4.53                            | 2.98E-21 | 4.02E-18 |

**Table S4. The binding ability between DDIT4 mRNA or DDIT4-AS1 with different RNA binding proteins.**

| Protein ID         | DDIT4 mRNA    |                | DDIT4-AS1     |                |
|--------------------|---------------|----------------|---------------|----------------|
|                    | RF Classifier | SVM Classifier | RF Classifier | SVM Classifier |
| <b>TTP(ZFP36)</b>  | 0.9           | 0.716          | 0.8           | 0.861          |
| <b>HNRPD(AUF1)</b> | 0.9           | 0.663          | 0.75          | 0.75           |
| <b>KHSRP</b>       | 0.8           | 0.651          | 0.75          | 0.806          |
| ELAV2(Hel-N1)      | 0.8           | 0.469          | 0.8           | 0.709          |
| TIA1               | 0.8           | 0.457          | 0.85          | 0.795          |
| ELAVL4(HuD)        | 0.75          | 0.52           | 0.75          | 0.773          |
| BRF1               | 0.75          | 0.468          | 0.75          | 0.71           |
| ELAV1(HuR)         | 0.75          | 0.412          | 0.75          | 0.683          |

**Table S5. Target sequences of shRNAs and siRNAs.**

|                       |                       |
|-----------------------|-----------------------|
| shRNA target sequence |                       |
| shNT                  | TTCTCCGAACGTGTCACGT   |
| shDDIT4-AS1-1         | CAGCTCAACTCTGCAGTACAC |
| shDDIT4-AS1-2         | AAGCCTTTGTTTCATGCTACA |
| siRNA target sequence |                       |
| siNC                  | Ribobio               |

|                                |                                                                                                                                           |
|--------------------------------|-------------------------------------------------------------------------------------------------------------------------------------------|
| siZFP36                        | ACCGACGATATAATTATTATA                                                                                                                     |
| siAUF1                         | CGCCTACTACTCACACTACTA                                                                                                                     |
| siKHSRP                        | GGGUCCCUCUGAAGUUUAAAdTdT                                                                                                                  |
| lncRNA siRNA #1                | CACAUCCAGCUGGAAGCCUUTT                                                                                                                    |
| BECN1 siRNA                    | CTCAGGAGAGGAGCCATTTdTdT                                                                                                                   |
| ATG5 siRNA                     | GCAACTCTGGATGGGATTG                                                                                                                       |
| DDIT4 siRNA                    | ACACTTGTGTGCCAACCTG                                                                                                                       |
| TCF4 siRNA #1                  | GCUCUGAGAUCAAUCCGAdTdT                                                                                                                    |
| TCF4 siRNA #2                  | GCACUUGCUUCCGAUCUAUUdTdT                                                                                                                  |
| Smart silencer target sequence |                                                                                                                                           |
| 491934                         | CACATCCAGCTGGAAGCCTT<br>CCTACAACAGGTCATAACAA<br>AAGTTCAACACTCCTCAATG<br>CTACAACAGGTCATAACAA<br>CTGCCTACAACAGGTCATA<br>CAACAGGTCATAACAAAA  |
| 573602                         | GGTTTGTCATGCTGACACT<br>CCTTCTCTGTCCTCACAGT<br>TGGAAGCTTCTGTGGTCTT<br>ATGCTGACACTGATGACAGA<br>ACCCTCTAGCTCATTATGTA<br>ACTCATGCCTGCAGTAACTG |
| 576234                         | GCCTATCCACTGCTTTCAA<br>CTCAGCCAATCTCCTCTTT<br>CGACGACAATAAATTCTCT<br>CTTCTGCACTCTACCAGCTT<br>CTCCTATCCTCTCTTGCCC<br>CATCACTGCTGTACACCCTG  |
| 596379                         | GCCTATCCACTGCTTTCAA<br>CTCAGCCAATCTCCTCTTT<br>CGACGACAATAAATTCTCT<br>CTTCTGCACTCTACCAGCTT<br>CTCCTATCCTCTCTTGCCC<br>CATCACTGCTGTACACCCTG  |
